# Supplementary material for: The nucleoid occlusion protein SlmA is a direct transcriptional activator of chitobiose utilization in Vibrio cholerae
Source: PubMed Central journal article supplement (PMC5519180; doi:10.1371/journal.pgen.1006877), 2017-07-06

$P_{chb}$ -GFP

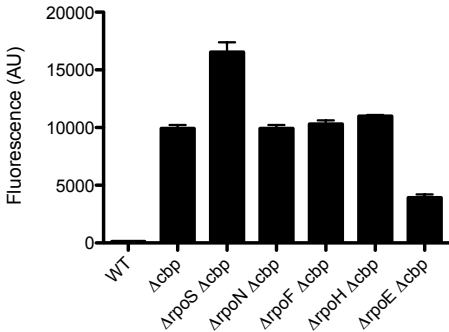

Supplement: pgen.1006877.s013.pdf [file pgen.1006877.s013.pdf]
