# Supplementary material for: The nucleoid occlusion protein SlmA is a direct transcriptional activator of chitobiose utilization in Vibrio cholerae
Source: PLOS journal article supplement (doi:10.1371/journal.pgen.1006877), 2017-07-06

$P_{chb}$ -GFP

$\Delta slmA$  background

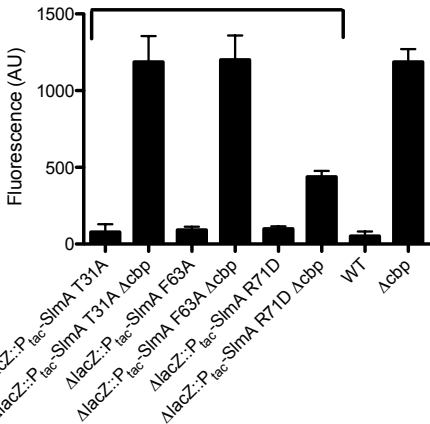

Supplement: S11 (10.1371/journal.pgen.1006877.s011) [file journal.pgen.1006877.s011]
